# Supplementary material for: Insight into the Molecular Signature of Skeletal Muscle Characterizing Lifelong Football Players
Source: MDPI journal article supplement (doi:10.3390/ijerph192315835), 2022-11-28
Supplement: s1 [file s1]

**Table S1. Metabolite abbreviations and extended names**

---

|                                                                               |
|-------------------------------------------------------------------------------|
| <b>C0</b> , free carnitine                                                    |
| <b>C2</b> , Acetylcarnitine                                                   |
| <b>C3</b> Propionylcarnitine                                                  |
| <b>C3</b> , Propionylcarnitine                                                |
| <b>C4</b> , Butyrylcarnitine                                                  |
| <b>C5</b> , Isovalerylcarnitine                                               |
| <b>C6</b> , Hexanoylcarnitine                                                 |
| <b>C8</b> , Octanoylcarnitine/Caprylylcarnitine                               |
| <b>C10</b> , Decanoylcarnitine/Caprylcarnitine                                |
| <b>C12</b> , Dodecanoylcarnitine/Laurylcarnitine                              |
| <b>C14</b> , Tetradecanoylcarnitine/ Myristylcarnitine                        |
| <b>C16</b> , Hexadecanoylcarnitine/Palmitoylcarnitine                         |
| <b>C18</b> , Octadecanoylcarnitine/Stearyl carnitine                          |
| <b>C5:1</b> , Tiglylcarnitine/3-Methyl-crotonylcarnitine                      |
| <b>C6:1</b> , Hexenoylcarnitine                                               |
| <b>C8:1</b> , Octenoylcarnitine                                               |
| <b>C10:1</b> , Decenoylcarnitine                                              |
| <b>C10:2</b> , Decadienoylcarnitine                                           |
| <b>C12:1</b> , Dodecenoylcarnitine                                            |
| <b>C14:1</b> ; Tetradecenoylcarnitine                                         |
| <b>C14:2</b> , Tetradecadienoylcarnitine                                      |
| <b>C16:1</b> ; Hexadecenoylcarnitine                                          |
| <b>C18:1</b> ; Octadecenoylcarnitine                                          |
| <b>C18:2</b> ; Octadecadienoylcarnitine                                       |
| <b>C4OH</b> , 3-Hydroxybutyrylcarnitine                                       |
| <b>C5OH</b> , 3-Hydroxyisovalerylcarnitine/3-hydroxy-2 methylbutyrylcarnitine |
| <b>C6OH</b> , 3-Hydroxyhexanoylcarnitine                                      |
| <b>C12OH</b> , 3-Hydroxydodecanoylcarnitine                                   |
| <b>C14OH</b> , 3-Hydroxytetradecanoylcarnitine                                |
| <b>C16OH</b> , 3-Hydroxyhexadecanoylcarnitine                                 |
| <b>C16:1OH</b> , 3-Hydroxyhexadecenoylcarnitine                               |
| <b>C18:1OH</b> , 3-Hydroxyoctadecenoylcarnitine                               |
| <b>C3DC</b> , Malonylcarnitine                                                |
| <b>C4DC</b> , Methylmalonilcarnitine                                          |
| <b>C5DC</b> , Glutarylcarnitine                                               |
| <b>C6DC</b> , Methylglutarylcarnitine                                         |
| <b>C8DC</b> , Octanedioylcarnitine                                            |
| <b>C10DC</b> , Decanedioylcarnitine                                           |
| <b>Ala</b> , Alanine                                                          |
| <b>Val</b> , Valine                                                           |
| <b>Xle</b> , Leucin or Isoleucine                                             |
| <b>Met</b> , Methionine                                                       |
| <b>Phe</b> , Phenylalanine                                                    |
| <b>Tyr</b> , Tyrosine                                                         |

**Asp,** Aspartic Acid

**Glu,** Glutamic Acid

**Gly,** Glycine

**Orn,** Ornithine

**Cit,** Citrulline

**Arg,** Arginine
