# Supplementary material for: Insight into the Molecular Signature of Skeletal Muscle Characterizing Lifelong Football Players
Source: MDPI journal article supplement (doi:10.3390/ijerph192315835), 2022-11-28
Supplement: s1 [file s1]

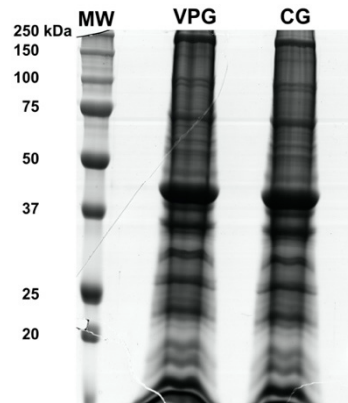

**Figure S1.** SDS-PAGE analysis of proteins in skeletal muscle from veteran football players (VPG) versus untrained subjects (CG). MW: molecular weight protein standard.
