# Supplementary material for: Insight into the Molecular Signature of Skeletal Muscle Characterizing Lifelong Football Players
Source: MDPI journal article supplement (doi:10.3390/ijerph192315835), 2022-11-28
Supplement: s1 [file s1]

**Table S2. Amino acid concentrations (microM) in muscle sample**

|              | <b>Ala</b> | <b>Val</b> | <b>Xle</b> | <b>Met</b> | <b>Phe</b> | <b>Tyr</b> | <b>Asp</b> | <b>Glu</b> | <b>Gly</b> | <b>Orn</b> | <b>Cit</b> | <b>Arg</b> |
|--------------|------------|------------|------------|------------|------------|------------|------------|------------|------------|------------|------------|------------|
| <b>CG_1</b>  | 394.784    | 77.815     | 94.564     | 20.915     | 22.602     | 23.182     | 155.462    | 3187.066   | 615.114    | 42.237     | 35.753     | 101.08     |
| <b>CG_2</b>  | 340.077    | 77.276     | 101.373    | 18.6       | 23.468     | 24.513     | 159.31     | 3329.234   | 620.992    | 42.088     | 35.277     | 105.381    |
| <b>CG_3</b>  | 420.516    | 75.26      | 104.473    | 20.457     | 24.326     | 26.629     | 139.611    | 3212.395   | 617.464    | 42.773     | 35.961     | 104.984    |
| <b>CG_4</b>  | 820.262    | 90.58      | 166.104    | 24.111     | 33.794     | 43.674     | 215.797    | 3166.61    | 869.132    | 95.277     | 67.432     | 183.704    |
| <b>CG_5</b>  | 748.305    | 90.986     | 172.899    | 23.971     | 32.681     | 38.462     | 193.162    | 2910.959   | 861.941    | 90.922     | 69.67      | 187.384    |
| <b>CG_6</b>  | 779.923    | 87.189     | 174.156    | 23.584     | 33.825     | 43.558     | 206.276    | 2711.098   | 861.665    | 93.271     | 67.824     | 185.209    |
| <b>CG_7</b>  | 574.979    | 86.273     | 133.257    | 17.29      | 31.12      | 32.63      | 127.353    | 2094.326   | 559.988    | 70.196     | 39.901     | 116.583    |
| <b>CG_8</b>  | 549.56     | 92.814     | 145.687    | 19.394     | 30.209     | 35.336     | 127.413    | 1974.643   | 560.031    | 69.501     | 40.055     | 115.881    |
| <b>CG_9</b>  | 559.815    | 82.408     | 133.393    | 19.357     | 31.683     | 34.655     | 131.415    | 1868.448   | 555.33     | 68.107     | 40.046     | 115.323    |
| <b>VPG_1</b> | 621.636    | 80.132     | 129.015    | 19.47      | 31.665     | 35.135     | 75.869     | 2697.902   | 725.046    | 105.18     | 42.263     | 190.705    |
| <b>VPG_2</b> | 642.09     | 85.301     | 141.875    | 22.468     | 33.105     | 34.822     | 76.829     | 2772.18    | 716.182    | 108.12     | 41.951     | 192.694    |
| <b>VPG_3</b> | 635.031    | 83.407     | 133.85     | 21.723     | 33.438     | 36.802     | 76.196     | 2748.37    | 718.658    | 108.63     | 42.544     | 187.239    |
| <b>VPG_4</b> | 817.248    | 124.757    | 185.818    | 35.513     | 36.848     | 40.883     | 197.335    | 2657.836   | 938.453    | 100.91     | 22.544     | 163.089    |
| <b>VPG_5</b> | 753.827    | 124.595    | 194.63     | 33.525     | 38.173     | 37.472     | 195.66     | 2477.66    | 936.8      | 100.86     | 23.221     | 160.499    |
| <b>VPG_6</b> | 788.302    | 132.781    | 196.169    | 35.728     | 37.011     | 41.185     | 208.3      | 2528.822   | 939.028    | 98.216     | 22.756     | 157.202    |
| <b>VPG_7</b> | 670.062    | 107.558    | 148.449    | 23.137     | 36.75      | 52.249     | 156.032    | 2529.77    | 748.954    | 136.89     | 33.569     | 163.159    |
| <b>VPG_8</b> | 683.855    | 110.766    | 151.819    | 27.42      | 38.155     | 54.868     | 152.862    | 2370.571   | 757.561    | 139.77     | 33.724     | 155.594    |
| <b>VPG_9</b> | 639.876    | 111.716    | 152.934    | 25.426     | 36.654     | 50.791     | 156.025    | 2468.769   | 742.17     | 133.83     | 33.68      | 162.548    |
