# Supplementary material for: Insight into the Molecular Signature of Skeletal Muscle Characterizing Lifelong Football Players
Source: MDPI journal article supplement (doi:10.3390/ijerph192315835), 2022-11-28
Supplement: s1 [file s1]

**Table S5. Branched AC concentrations (microM) in muscle sample**

|              | <b>C3DC</b> | <b>C4DC</b> | <b>C5DC</b> | <b>C6DC</b> | <b>C8DC</b> | <b>C10DC</b> |
|--------------|-------------|-------------|-------------|-------------|-------------|--------------|
| <b>CG_1</b>  | 0.115       | 0.153       | 0.115       | 0.078       | 0.047       | 0.045        |
| <b>CG_2</b>  | 0.068       | 0.154       | 0.12        | 0.05        | 0.033       | 0.069        |
| <b>CG_3</b>  | 0.065       | 0.13        | 0.065       | 0.037       | 0.11        | 0.087        |
| <b>CG_4</b>  | 0.038       | 0.075       | 0.3         | 0.038       | 0.094       | 0.252        |
| <b>CG_5</b>  | 0.062       | 0.104       | 0.393       | 0.031       | 0.078       | 0.029        |
| <b>CG_6</b>  | 0.054       | 0.108       | 0.288       | 0.047       | 0.063       | 0.052        |
| <b>CG_7</b>  | 0.038       | 0.057       | 0.048       | 0.015       | 0.046       | 0.027        |
| <b>CG_8</b>  | 0.069       | 0.079       | 0.069       | 0.009       | 0.019       | 0.027        |
| <b>CG_9</b>  | 0.025       | 0.137       | 0.137       | 0.03        | 0.05        | 0.029        |
| <b>VPG_1</b> | 0.035       | 0.177       | 0.047       | 0.027       | 0.054       | 0.027        |
| <b>VPG_2</b> | 0.08        | 0.114       | 0.023       | 0.017       | 0.009       | 0.03         |
| <b>VPG_3</b> | 0.125       | 0.1         | 0.075       | 0.022       | 0.011       | 0.051        |
| <b>VPG_4</b> | 0.011       | 0.086       | 0.032       | 0.026       | 0.035       | 0.036        |
| <b>VPG_5</b> | 0.073       | 0.146       | 0.049       | 0.01        | 0.03        | 0.043        |
| <b>VPG_6</b> | 0.065       | 0.155       | 0.09        | 0.039       | 0.02        | 0.008        |
| <b>VPG_7</b> | 0.039       | 0.096       | 0.116       | No data     | 0.025       | 0.055        |
| <b>VPG_8</b> | 0.106       | 0.084       | 0.021       | 0.041       | 0.055       | 0.024        |
| <b>VPG_9</b> | 0.045       | 0.045       | 0.03        | 0.059       | 0.012       | 0.056        |
