# Supplementary material for: Insight into the Molecular Signature of Skeletal Muscle Characterizing Lifelong Football Players
Source: MDPI journal article supplement (doi:10.3390/ijerph192315835), 2022-11-28
Supplement: s1 [file s1]

**Table S4 Unsaturated AC concentrations (microM) in muscle sample**

|              | <b>C5:1</b> | <b>C6:1</b> | <b>C8:1</b> | <b>C10:1</b> | <b>C10:2</b> | <b>C12:1</b> | <b>C14:1</b> | <b>C14:2</b> | <b>C16:1</b> | <b>C18:1</b> | <b>C18:2</b> |
|--------------|-------------|-------------|-------------|--------------|--------------|--------------|--------------|--------------|--------------|--------------|--------------|
| <b>CG_1</b>  | 0.037       | 0.046       | 0.057       | 0.038        | 0.115        | 0.031        | 0.016        | 0.047        | 0.136        | 0.03         | No data      |
| <b>CG_2</b>  | 0.093       | 0.13        | 0.051       | 0.051        | 0.154        | 0.067        | 0.083        | 0.083        | 0.035        | 0.035        | 0.087        |
| <b>CG_3</b>  | 0.042       | 0.064       | 0.114       | 0.033        | 0.065        | 0.037        | 0.018        | 0.037        | 0.029        | 0.029        | 0.087        |
| <b>CG_4</b>  | 0.035       | 0.035       | 0.038       | 0.038        | 0.075        | 0.075        | 0.075        | 0.056        | 0.147        | 0.042        | No data      |
| <b>CG_5</b>  | 0.064       | 0.077       | 0.083       | 0.083        | 0.083        | 0.047        | 0.031        | 0.016        | 0.044        | 0.015        | 0.029        |
| <b>CG_6</b>  | 0.05        | 0.05        | 0.054       | 0.054        | 0.036        | 0.047        | 0.016        | 0.094        | 0.104        | 0.052        | 0.087        |
| <b>CG_7</b>  | 0.063       | 0.048       | 0.048       | 0.038        | 0.066        | 0.015        | 0.031        | 0.015        | 0.027        | 0.009        | 0.045        |
| <b>CG_8</b>  | 0.019       | 0.065       | 0.05        | 0.02         | 0.099        | 0.066        | 0.038        | 0.009        | 0.027        | 0.045        | 0.018        |
| <b>CG_9</b>  | 0.055       | 0.033       | 0.025       | 0.025        | 0.075        | 0.02         | 0.03         | 0.02         | 0.029        | 0.019        | 0.019        |
| <b>VPG_1</b> | 0.034       | 0.068       | 0.024       | 0.047        | 0.106        | 0.063        | 0.036        | 0.009        | 0.054        | 0.018        | 0.036        |
| <b>VPG_2</b> | 0.03        | 0.04        | 0.011       | 0.034        | 0.057        | 0.043        | 0.017        | 0.009        | 0.01         | 0.05         | 0.03         |
| <b>VPG_3</b> | 0.032       | 0.042       | 0.05        | 0.025        | 0.037        | 0.043        | 0.022        | 0.011        | 0.031        | 0.041        | 0.031        |
| <b>VPG_4</b> | 0.034       | 0.09        | 0.011       | 0.065        | 0.054        | 0.069        | 0.061        | 0.009        | 0.009        | 0.018        | 0.063        |
| <b>VPG_5</b> | No data     | 0.043       | 0.049       | 0.049        | 0.036        | 0.039        | 0.069        | 0.02         | 0.026        | 0.017        | 0.043        |
| <b>VPG_6</b> | 0.013       | 0.05        | 0.052       | 0.078        | 0.065        | 0.039        | 0.069        | 0.02         | 0.008        | 0.025        | 0.017        |
| <b>VPG_7</b> | 0.066       | 0.016       | 0.019       | 0.058        | 0.058        | 0.063        | 0.025        | 0.013        | 0.011        | 0.022        | 0.022        |
| <b>VPG_8</b> | 0.058       | 0.101       | 0.084       | 0.063        | 0.084        | 0.014        | 0.028        | 0.028        | 0.024        | 0.036        | 0.012        |
| <b>VPG_9</b> | 0.039       | 0.105       | 0.06        | 0.045        | 0.075        | 0.012        | 0.047        | 0.035        | 0.033        | 0.011        | 0.011        |
