# Supplementary material for: Insight into the Molecular Signature of Skeletal Muscle Characterizing Lifelong Football Players
Source: MDPI journal article supplement (doi:10.3390/ijerph192315835), 2022-11-28
Supplement: s1 [file s1]

**Table S3. Metabolite concentrations (microM) in muscle sample**

|              | <b>C0</b> | <b>C2</b> | <b>C3</b> | <b>C4</b> | <b>C5</b> | <b>C6</b> | <b>C8</b> | <b>C10</b> | <b>C12</b> | <b>C14</b> | <b>C16</b> | <b>C18</b> |
|--------------|-----------|-----------|-----------|-----------|-----------|-----------|-----------|------------|------------|------------|------------|------------|
| <b>CG_1</b>  | 1431.952  | 298.607   | 0.307     | 0.103     | 0.083     | 0.037     | 0.038     | 0.096      | 0.047      | 0.031      | 0.091      | No data    |
| <b>CG_2</b>  | 1803.842  | 403.057   | 0.398     | 0.051     | 0.047     | 0.028     | 0.034     | 0.103      | 0.083      | 0.033      | 0.052      | 0.035      |
| <b>CG_3</b>  | 1633.107  | 301.742   | 0.389     | 0.073     | 0.085     | 0.074     | 0.049     | 0.065      | 0.037      | 0.037      | 0.058      | 0.029      |
| <b>CG_4</b>  | 1794.908  | 256.983   | 0.078     | 0.048     | 0.023     | No data   | 0.019     | 0.038      | 0.056      | 0.056      | 0.482      | 0.042      |
| <b>CG_5</b>  | 1669.779  | 257.345   | 0.171     | 0.118     | 0.064     | 0.026     | 0.104     | 0.104      | 0.047      | No data    | 0.058      | 0.102      |
| <b>CG_6</b>  | 1734.021  | 227.098   | 0.648     | 0.059     | 0.03      | 0.05      | 0.054     | 0.054      | 0.094      | 0.079      | 0.035      | 0.017      |
| <b>CG_7</b>  | 1600.631  | 91.826    | 0.168     | 0.05      | 0.04      | 0.008     | 0.01      | 0.085      | 0.023      | 0.023      | 0.054      | 0.027      |
| <b>CG_8</b>  | 1705.103  | 86.322    | 0.26      | 0.049     | 0.037     | 0.037     | 0.03      | 0.05       | 0.038      | 0.028      | 0.071      | 0.036      |
| <b>CG_9</b>  | 1805.944  | 93.945    | 0.476     | 0.042     | 0.022     | 0.077     | 0.05      | 0.025      | 0.03       | 0.04       | 0.019      | 0.019      |
| <b>VPG_1</b> | 1756.19   | 205.484   | 0.306     | 0.115     | 0.034     | 0.011     | 0.071     | 0.035      | 0.036      | 0.054      | 0.027      | 0.009      |
| <b>VPG_2</b> | 1756.958  | 202.576   | 0.382     | 0.045     | 0.04      | 0.02      | 0.046     | 0.046      | 0.017      | 0.026      | 0.01       | 0.03       |
| <b>VPG_3</b> | 2002.197  | 193.612   | 0.843     | 0.024     | 0.032     | No data   | 0.037     | 0.05       | 0.032      | 0.011      | 0.051      | 0.031      |
| <b>VPG_4</b> | 1534.527  | 203.14    | 0.54      | 0.024     | 0.057     | 0.045     | 0.043     | 0.043      | 0.035      | 0.026      | 0.036      | 0.009      |
| <b>VPG_5</b> | 1654.274  | 208.31    | 0.278     | 0.115     | 0.022     | 0.011     | 0.085     | 0.146      | 0.049      | 0.039      | 0.017      | 0.035      |
| <b>VPG_6</b> | 1612.113  | 173.612   | 0.521     | 0.077     | 0.076     | 0.038     | 0.039     | 0.039      | 0.039      | 0.02       | 0.042      | 0.008      |
| <b>VPG_7</b> | 1733.324  | 234.918   | 0.667     | 0.036     | 0.049     | 0.016     | 0.077     | 0.058      | 0.025      | 0.038      | 0.011      | 0.022      |
| <b>VPG_8</b> | 1863.375  | 188.107   | 0.227     | 0.03      | 0.029     | 0.029     | 0.021     | 0.063      | 0.055      | 0.069      | 0.048      | 0.024      |
| <b>VPG_9</b> | 1732.522  | 200.478   | 0.298     | 0.11      | 0.052     | 0.026     | 0.03      | 0.06       | 0.071      | 0.024      | 0.044      | 0.022      |
