# Supplementary material for: Insight into the Molecular Signature of Skeletal Muscle Characterizing Lifelong Football Players
Source: MDPI journal article supplement (doi:10.3390/ijerph192315835), 2022-11-28
Supplement: s1 [file s1]

**Table S6. Hydroxylated AC concentrations (microM) in muscle sample**

|              | <b>C4OH</b> | <b>C5OH</b> | <b>C6OH</b> | <b>C12OH</b> | <b>C14OH</b> | <b>C16OH</b> | <b>C16:1OH</b> | <b>C18OH</b> | <b>C18:1OH</b> |
|--------------|-------------|-------------|-------------|--------------|--------------|--------------|----------------|--------------|----------------|
| <b>CG_1</b>  | 0.083       | 0.037       | 0.083       | 0.016        | 0.076        | 0.045        | 0.076          | No data      | 0.045          |
| <b>CG_2</b>  | 0.019       | 0.084       | 0.065       | 0.017        | 0.139        | 0.087        | 0.087          | 0.035        | 0.017          |
| <b>CG_3</b>  | 0.032       | 0.032       | 0.042       | 0.092        | 0.058        | 0.029        | 0.015          | No data      | 0.029          |
| <b>CG_4</b>  | 0.023       | 0.07        | 0.058       | 0.094        | 0.252        | 0.147        | 0.063          | 0.042        | 0.063          |
| <b>CG_5</b>  | 0.026       | 0.038       | 0.128       | 0.062        | 0.276        | 0.102        | 0.015          | 0.044        | 0.015          |
| <b>CG_6</b>  | 0.06        | 0.04        | 0.03        | 0.063        | 0.312        | 0.035        | 0.017          | No data      | 0.017          |
| <b>CG_7</b>  | 0.024       | 0.04        | 0.04        | 0.023        | 0.081        | 0.099        | 0.027          | 0.027        | No data        |
| <b>CG_8</b>  | 0.028       | 0.056       | 0.074       | 0.019        | 0.08         | 0.089        | 0.009          | 0.009        | 0.045          |
| <b>CG_9</b>  | 0.022       | 0.077       | 0.033       | 0.02         | 0.058        | 0.106        | 0.039          | No data      | 0.019          |
| <b>VPG_1</b> | 0.034       | 0.056       | 0.034       | 0.018        | 0.036        | 0.081        | 0.018          | 0.009        | 0.018          |
| <b>VPG_2</b> | 0.071       | 0.04        | 0.061       | 0.017        | 0.05         | 0.099        | 0.02           | 0.04         | 0.02           |
| <b>VPG_3</b> | 0.032       | 0.063       | 0.063       | 0.011        | 0.061        | 0.113        | No data        | 0.021        | 0.01           |
| <b>VPG_4</b> | 0.079       | 0.023       | 0.113       | 0.035        | 0.054        | 0.045        | 0.018          | 0.018        | 0.018          |
| <b>VPG_5</b> | 0.054       | 0.043       | 0.054       | 0.03         | 0.095        | 0.035        | 0.009          | 0.009        | No data        |
| <b>VPG_6</b> | 0.05        | 0.101       | 0.138       | 0.02         | 0.05         | 0.067        | 0.025          | No data      | 0.017          |
| <b>VPG_7</b> | 0.033       | 0.082       | 0.066       | 0.025        | 0.033        | 0.044        | No data        | No data      | 0.011          |
| <b>VPG_8</b> | 0.043       | 0.043       | 0.029       | 0.014        | 0.024        | 0.084        | 0.036          | No data      | No data        |
| <b>VPG_9</b> | 0.039       | 0.052       | 0.039       | 0.012        | 0.044        | 0.056        | 0.011          | 0.011        | 0.044          |
